# Supplementary material
Source: PubMed Central journal article supplement (PMC3844128)
Supplement: NIHMS502489-supplement-supplement_1.pdf [file NIHMS502489-supplement-supplement_1.pdf]

Table A1: Procedure Codes Used to Identify Major Amputations

| Level         | ICD-9-CM Codes | CPT-4 Codes   |
|---------------|----------------|---------------|
| Ankle or Leg  | 84.13 – 84.15  | 27880 – 27889 |
| Knee or above | 84.16 – 84.17  | 27590 – 27598 |

Table A2: Comorbidities and their Definitions in ICD-9-CM Codes

| Co-Existing Condition         | ICD-9-CM Codes                                                                                                               |
|-------------------------------|------------------------------------------------------------------------------------------------------------------------------|
| Peripheral Neuropathy         | 250.6, 355.x, 337.1, 357.2                                                                                                   |
| Coronary Artery Disease       | 410.xx – 414.xx, 429.2                                                                                                       |
| Peripheral Artery Disease     | 250.7, 443.9                                                                                                                 |
| History of Vascular Procedure | Procedure codes 39.25, 39.29, 39.49, 39.50, 39.90, or 00.40 – 00.48, 00.55, 00.60 used with 440.20 - 440.24 diagnostic codes |
| Foot Ulcers                   | 707.1x, 707.9                                                                                                                |
| Osteomyelitis                 | 730.06 – 730.09, 731.06 – 731.09, 732.06 – 732.09                                                                            |

\* Diagnostic codes for all other comorbidities were obtained from <http://www.hcup-us.ahrq.gov/reports/ComorbiditySoftwareDocumentationFinal.pdf>.
